# Supplementary material
Source: Research Square preprint supplement (doi:10.21203/rs.3.rs-7427988/v1)
Supplement: Supplementary file 1 [file 8982e603ef8ed5a6f01cf377.docx]

Table S1. Definition and assignment of variables

| N | Variables | Label | Type | Code |
| --- | --- | --- | --- | --- |
| 1 | Age | Age ( years) | Cont |  |
| 2 | Gender | Gender | Categ | 1:Male; 0:Female |
| 3 | Education | Education levels | Categ | 1:Illiterate; 2.Junior school; 3:High schools and vocational school; 4: Higher education |
| 4 | Marriage | Marital status | Categ | 1:Married; 0:Single |
| 5 | Cancer | Whether the respondent reported having cancer or a malignant tumor (excluding minor skin cancers) | Categ | 1:Yes; 0:No |
| 6 | Liver | Whether the respondent reported having any liver disease (except fatty liver, tumors, and cancer) | Categ | 1:Yes; 0:No |
| 7 | Kidney | Whether the respondent reported having any kidney disease (except for tumor or cancer) | Categ | 1:Yes; 0:No |
| 8 | Digest | Whether the respondent reported having any stomach or other digestive disease (except for tumor or cancer) | Categ | 1:Yes; 0:No |
| 9 | Hypertension | Whether the respondent reported or self-reported history having hypertension | Categ | 1:Yes; 0:No |
| 10 | Drinking | Had any alcoholic beverage in the last 12 months | Categ | 1:Yes; 0:No |
| 11 | Smoking | Whether there is a habit of smoking at present | Categ | 1:Yes; 0:No |
| 12 | Mwaist | Waist measurement(cm) | Cont |  |
| 13 | BMI | Body mass index (kg/m2) | Cont |  |
| 14 | Sleep | Hours of sleep(h) | Cont |  |
| 15 | WBC | White blood cell count(10^9/L) | Cont |  |
| 16 | MCV | Mean corpuscular volume(fl) | Cont |  |
| 17 | PLT | Platelet count(10^9/L) | Cont |  |
| 18 | BUN | Blood urea nitrogen (mg/dl) | Cont |  |
| 19 | FBG | Fasting blood glucose (mg/dl) | Cont |  |
| 20 | CREA | Serum creatinine (mg/dl) | Cont |  |
| 21 | CHO | Total cholesterol (mg/dl) | Cont |  |
| 22 | TG | Triglycerides (mg/dl) | Cont |  |
| 23 | HDL-c | High-density lipoprotein cholesterol (mg/dl) | Cont |  |
| 24 | LDL-c | Low-density lipoprotein cholesterol (mg/dl) | Cont |  |
| 25 | CRP | C-reactive protein (mg/l) | Cont |  |
| 26 | HbA1c | Glycated hemoglobin (%) | Cont |  |
| 27 | UA | Uric acid(mg/dl) | Cont |  |
| 28 | TyG | Triglyceride glucose index | Cont |  |
| 29 | TyG-BMI | Baseline triglyceride glucose-body mass index | Cont |  |
| 30 | Cumulative TyG-BMI | Cumulative triglyceride glucose-body mass index | Cont |  |
| 31 | TyG-BMI-category | Categorized by quartiles of the index of cumulative TyG-BMI | Categ | 1:Q1; 2:Q2; 3:Q3; 4:Q4 |

The variables are all from the CHARLS data.

N: Number of Variables; Variables: The name or abbreviation of a variable; Label: the full name or description of the variable; Type: The type of variable, Cont (continuous variable) or Categ (categorical variable); Code: Assignment of categorical variables in R.

Table S2. Collinearity Statistics

| variables | VIF | Df | VIF(1/(2Df)) |
| --- | --- | --- | --- |
| Cumulative TyG-BMI | 11.168879 | 1 | 3.341987 |
| Gender | 2.270442 | 1 | 1.506799 |
| Age | 1.482442 | 1 | 1.217556 |
| Education | 1.317076 | 3 | 1.046972 |
| Marriage | 1.147885 | 1 | 1.071394 |
| Smoking | 1.592948 | 1 | 1.262120 |
| Drinking | 1.335251 | 1 | 1.155531 |
| Digest | 1.030806 | 1 | 1.015286 |
| Mwaist | 1.772411 | 1 | 1.331319 |
| Sleep | 1.037640 | 1 | 1.018646 |
| WBC | 1.120799 | 1 | 1.058678 |
| MCV | 1.061629 | 1 | 1.030354 |
| PLT | 1.106357 | 1 | 1.051835 |
| BUN | 1.092941 | 1 | 1.045438 |
| CHO | 8.664069 | 1 | 2.943479 |
| HDL-c | 2.578273 | 1 | 1.605700 |
| LDL-c | 6.798883 | 1 | 2.607467 |
| HbA1c | 1.051893 | 1 | 1.025618 |
| UA | 1.389701 | 1 | 1.178856 |
| Hypertension | 1.124605 | 1 | 1.060474 |
| TyG | 4.108766 | 1 | 2.027009 |
| TyG-BMI | 12.463590 | 1 | 3.530381 |

Abbreviations as in table S1.

VIF: variance inflation factor; DF: Degrees of Freedom; VIF(1/(2Df)): Variance Inflation Factor (adjusted by 1/(2 * Degrees of Freedom)).

The variables with VIF(1/(2Df))>10 will be regarded as collinear variables and cannot be included in the multiple regression model.


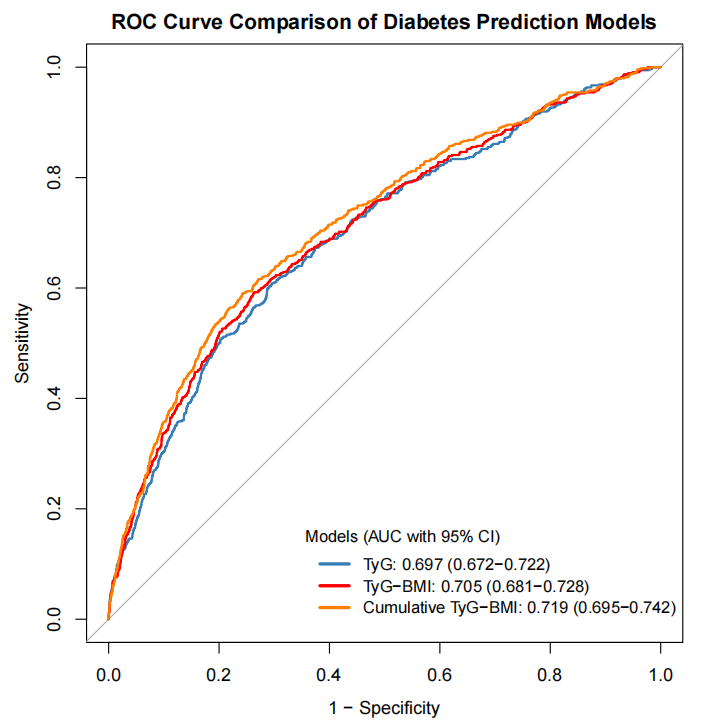


Figure S1. ROC curves comparison of diabetes prediction models in TyG, TyG-BMI and cumulative TyG-BMI

Abbreviations as in table S1.

AUC: Area Under the Receiver Operating Characteristic Curve; CI: Confidence interval.

Table S3.Compare baseline characteristics of selected and excluded participants

| Variables |  | Excluded | Included | *P* | SMD |
| --- | --- | --- | --- | --- | --- |
| N |  | 9783 | 4945 |  |  |
| Age(mean (SD)) |  | 59.4 (10.4) | 58.9 (8.7) | 0.006 | 0.050 |
| Gender (%) | 0 | 4848 (49.6) | 2635 (53.3) | <0.001 | 0.075 |
|  | 1 | 4935 (50.4) | 2310 (46.7) |  |  |

Excluded:excluded participants; Included: included participants.

SMD: standardized mean differences.

Table S4.Association between the cumulative TyG-BMI index and the incidence of diabetes incidence

| Cumulative  TyG-BMI(cluster center) | N(%) | Crude | |  | Model 1 | |  | Model 2 | |  | Model 3 | |
| --- | --- | --- | --- | --- | --- | --- | --- | --- | --- | --- | --- | --- |
| *OR*(95%*CI*) | *P* |  | *OR*(95%*CI*) | *P* |  | *OR*(95%*CI*) | *P* |  | OR(95%*CI*) | *P* |
| C2(574.712) | 1683(34.034) | 1.455(1.083~1.955) | 0.013 |  | 1.592(1.181~2.146) | 0.002 |  | 1.553(1.142~2.114) | 0.005 |  | 1.497(1.090~2.055) | 0.013 |
| C3(667.703) | 1349(27.280) | 2.498(1.877~3.325) | <0.001 |  | 2.844(2.123~3.801) | <0.001 |  | 2.745(1.978~3.811) | <0.001 |  | 2.522(1.775~3.3583) | <0.001 |
| C4(786.864) | 712(14.398) | 4.320(3.202~5.828) | <0.001 |  | 5.167(3.783~7.057) | <0.001 |  | 4.671(3.187~6.844) | <0.001 |  | 3.577(2.341~5.465) | <0.001 |
| *P*trend |  | <0.001 |  |  | <0.001 |  |  | <0.001 |  |  | <0.001 |  |

Crude：Cumulative TyG-BMI index was divided into four clusters (C1-C4) using K-means cluster analysis.

Model 1：Adjusted for gender and age.

Model 2：Adjusted for the variables in model 1 plus education, marry, smoking, drinking, digest, Mwaist, sleep, hypertension.

Model 3:Adjusted for the variables in model 2 plus WBC, MCV, PLT, BUN, CHO, HDL-c, LDL-c, HbA1c, UA.

Cluster center: The average of all data points in each cluster; Cumulative TyG-BMI: Cumulative triglyceride glucose-body mass index; *OR*: Odds ratio; *CI*: Confidence interval.

Table S5. Association between cumulative Ty G-BMI index and incidence of diabetes in elderly populations aged 65 years and older

| Cumulative  TyG-BMI | Crude | |  | Model 1 | |  | Model 2 | |  | Model 3 | |
| --- | --- | --- | --- | --- | --- | --- | --- | --- | --- | --- | --- |
| *OR*(95%*CI*) | *P* |  | *OR*(95%*CI*) | *P* |  | *OR*(95%*CI*) | *P* |  | OR(95%*CI*) | *P* |
| Q2 | 0.925（0.530~1.617） | 0.785 |  | 0.919(0.525~1.608) | 0.767 |  | 0.922(0.519~1.637) | 0.782 |  | 0.920(0.507~1.668) | 0.783 |
| Q3 | 1.496(0.898~2.493) | 0.122 |  | 1.473(0.882~2.462) | 0.139 |  | 1.392(0.789~2.456) | 0.254 |  | 1.348(0.740~2.457) | 0.329 |
| Q4 | 3.502(2.203~5.567) | <0.001 |  | 3.276(2.040~5.261) | <0.001 |  | 3.005(1.641~5.502) | 0.001 |  | 2.625(1.320~5.220) | 0.006 |
| *P*trend | <0.001 |  |  | <0.001 |  |  | <0.001 |  |  | <0.001 |  |
| Per 1 SD increase | 1.718(1.465~2.014) | <0.001 |  | 1.673(1.421~1.969) | <0.001 |  | 1.681(1.352~2.090) | <0.001 |  | 1.554(1.211~1.996) | 0.001 |

Crude：Interquartile grouping of the cumulative TyG-BMI index or Scale cumulative TyG-BMI index.

Model 1：Adjusted for gender and age.

Model 2：Adjusted for the variables in model 1 plus education, marry, smoking, drinking, digest, Mwaist, sleep, hypertension.

Model 3:Adjusted for the variables in model 2 plus WBC, MCV, PLT, BUN, CHO, HDL-c, LDL-c, HbA1c, UA.

Cumulative TyG-BMI: Cumulative triglyceride glucose-body mass index. *OR*: Odds ratio; *CI*: Confidence interval.
